# Supplementary material for: Detailed Characterization of Immune Cell Infiltrate and Expression of Immune Checkpoint Molecules PD-L1/CTLA-4 and MMR Proteins in Testicular Germ Cell Tumors Disclose Novel Disease Biomarkers
Source: Cancers (Basel). 2019 Oct 11;11(10):1535. doi: 10.3390/cancers11101535 (PMC6826711; doi:10.3390/cancers11101535)
Supplement: Supplementary file 1 [file cancers-11-01535-s001.zip › cancers-583339-suppl tables.xlsx]

## Sheet: Table S1
Table S1. Mixed Testicular Germ Cell Tumors and proportions of each component
Mixed TGCT*	Proportion of each component	Predominant component
Mixed TGCT #1	EC (40%) + YST (30%) + TE (30%)	EC
Mixed TGCT #2	TE (75%) + YST (25%)	TE
Mixed TGCT #3	TE (40%) + SE (30%) + EC (20%) + CH (5%) + YST (5%)	TE
Mixed TGCT #4	EC (95%) + SE (5%)	EC
Mixed TGCT #5	EC (50%) + TE (40%) + YST (10%)	EC
Mixed TGCT #6	EC (90%) + TE (5%) + YST (5%)	EC
Mixed TGCT #7	EC (70%) + YST (30%)	EC
Mixed TGCT #8	EC (40%) + SE (30%) + CH (20%) + YST (10%)	EC
Mixed TGCT #9	EC (85%) + TE (10%) + YST (5%)	EC
Mixed TGCT #10	YST (90%) + EC (10%)	YST
Mixed TGCT #11	SE (70%) + TE (20%) + EC (5%) + YST (5%)	SE
Mixed TGCT #12	SE (75%) + TE (24%) + YST (1%)	SE
Mixed TGCT #13	SE (60%) + TE (40%)	SE
Mixed TGCT #14	EC (90%) + YST (10%)	EC
Mixed TGCT #15	EC (70%) + YST (20%) + TE (10%)	EC
Mixed TGCT #16	EC (85%) + YST (10%) + TE (5%)	EC
Mixed TGCT #17	EC (90%) + YST (10%)	EC
Mixed TGCT #18	YST (85%) + TE (15%)	YST
Mixed TGCT #19	TE (95%) + SE (4%) + YST (1%)	TE
Mixed TGCT #20	EC (75%) + TE (25%)	EC
Mixed TGCT #21	EC (40%) + TE (30%) + YST (30%)	EC
Mixed TGCT #22	SE (70%) + EC (20%) + YST (7%) + TE (3%)	SE
Mixed TGCT #23	TE (70%) + YST (20%) + EC (10%)	TE
Mixed TGCT #24	EC (60%) + YST (30%) + TE (10%)	EC
Mixed TGCT #25	EC (60%) + TE (40%)	EC
Mixed TGCT #26	SE (60%) + TE (30%) + EC (5%) + YST (5%)	SE
Mixed TGCT #27	SE (60%) + EC (35%) + YST (5%)	SE
Mixed TGCT #28	SE (95%) + TE (5%)	SE
Mixed TGCT #29	YST (90%) + EC (5%) + CH (5%)	YST
Mixed TGCT #30	TE (80%) + EC (19%) + YST (1%)	TE
Mixed TGCT #31	EC (70%) + TE (20%) + CH (5%) + YST (5%)	EC
Mixed TGCT #32	EC (40%) + YST (35%) + TE (25%)	EC
Mixed TGCT #33	EC (70%) + SE (30%)	EC
Mixed TGCT #34	EC (40%) + YST (30%) + TE (25%) + SE (5%)	EC
Mixed TGCT #35	EC (80%) + SE (19%) + YST (1%)	EC
Mixed TGCT #36	EC (70%) + SE (29%) + TE (1%)	EC
Mixed TGCT #37	TE (80%) + SE (20%)	TE
Mixed TGCT #38	TE (60%) + EC (30%) + YST (5%) + CH (5%)	TE
Mixed TGCT #39	TE (70%) + SE (20%) + CH (5%) + YST (5%)	TE
Mixed TGCT #40	EC (80%) + CH (15%) + YST (4%) + TE (1%)	EC
Mixed TGCT #41	EC (50%) + TE (35%) + CH (10%) + YST (5%)	EC
Mixed TGCT #42	TE (65%) + YST (35%)	TE
Mixed TGCT #43	TE (50%) + EC (35%) + YST (15%)	TE
Mixed TGCT #44	YST (50%) + EC (20%) + TE (20%) + SE (10%)	YST
Mixed TGCT #45	YST (40%) + TE (20%) + EC (20%) + SE (5%) + CH (5%)	YST
Mixed TGCT #46	EC (90%) + YST (10%)	EC
Mixed TGCT #47	EC (40%) + CH (35%) + YST (15%) + TE (10%)	EC
Mixed TGCT #48	EC (40%) + YST (25%) + TE (25%) + SE (10%)	EC
Mixed TGCT #49	EC (90%) + YST (9%) + TE (1%)	EC
Mixed TGCT #50	YST (80%) + EC (19%) + TE (1%)	YST
Mixed TGCT #51	EC (70%) + TE (15%) + YST (10%) + CH (5%)	EC
Mixed TGCT #52	EC (70%) + SE (30%)	EC
Mixed TGCT #53	EC (65%) + SE (34%) + YST (1%)	EC
Mixed TGCT #54	EC (70%) + TE (30%)	EC
Mixed TGCT #55	EC (50%) + TE (40%) + YST (5%) + CH (4%) + SE (1%)	EC
Mixed TGCT #56	YST (55%) + CH (45%)	YST
Mixed TGCT #57	EC (85%) + YST (5%) + CH (5%) + SE (5%)	EC
Mixed TGCT #58	CH (95%) + YST (5%)	CH
Mixed TGCT #59	SE (30%) + TE (29%) + YST (21%) + EC (20%)	SE
Mixed TGCT #60	SE (40%) + EC (30%) + YST (25%) + TE (5%)	SE
Mixed TGCT #61	CH (30%) + SE (29%) + YST (21%) + EC (18%) + TE (2%)	CH
Mixed TGCT #62	N/A	N/A
Abbreviations: CH – choriocarcinoma; EC – embryonal carcinoma; N/A – not available; SE – seminoma; TE – teratoma; TGCT – testicular germ cell tumor; YST – yolk-sac tumor

## Sheet: Table S2
Table 2. Immunohistochemistry methodology details
Antibody	Vendor	Clone	Dilution	Antigen recovery	Staining instrument / Detection system
MLH-1	BD Pharmingen	G168-15	1/50	ER2	Leica Bond III / Bond Polymer refine Detection Kit
PMS-2	Leica	MORAG	1/100	ER2	Leica Bond III / Bond Polymer refine Detection Kit
MSH-2	BD Pharmingen	G219-1129	1/750	ER2	Leica Bond III / Bond Polymer refine Detection Kit
MSH-6	BD Pharmingen	44/MSH-6	1/500	ER2	Leica Bond III / Bond Polymer refine Detection Kit
CTL-A4	ThermoFisher Scientific	Polyclonal	1/100	ER2	Leica Bond III / Bond Polymer refine Detection Kit
CD20	Leica	7D1	1/100	CC1	Bench Mark ULTRA / OptiView DAB IHC Detection Kit
CD3	Leica	PS-1	1/150	CC1	Bench Mark ULTRA / OptiView DAB IHC Detection Kit
CD4	Leica	4B12	RTU	ER2	Leica Bond III / Bond Polymer refine Detection Kit
CD8	Leica	4B11	RTU	ER2	Leica Bond III / Bond Polymer refine Detection Kit
CD68	Dako	PG-M1	1/100	ER2	Leica Bond III / Bond Polymer refine Detection Kit
CD56	Leica	CD564	1/100	ER2	Leica Bond III / Bond Polymer refine Detection Kit
PD-L1	Dako	22C3	1/100	CC1	Bench Mark ULTRA / OptiView DAB IHC Detection Kit
Abbreviations: A-NED – alive with no evidence of disease; CT – chemotherapy; DFD – died from disease; D-NED – died with no evidence of disease; EC – embryonal carcinoma; GCNIS – germ cell neoplasia in situ; IQR – interquartile range; M – serum tumor markers; PAoLN – para-aortic lymph-nodes; RPLND – retroperitoneal lymph-node dissection; SE – seminoma; TE – teratoma.

## Sheet: Table S3
Table S3. IHC primary tumors
Patient_ID	Individual Subtype Considered	Overall Histology	CTLA4_ICpercentage_overallslide	CTLA4_TC_intensity_individual components	PDL1_ICpercentage_overallslide	PDL1_TC_percentage_individual components	MLH1 Intensity Score	MLH1 Percentage Score	MLH1 Combined score	PMS2 Intensity Score	PMS2 Percentage Score	PMS2 Combined score	MSH2 Intensity Score	MSH2 Percentage Score	MSH2 Combined score	MSH6 Intensity Score	MSH6 Percentage Score	MSH6 Combined score
2	Seminoma	Pure Seminoma	20-30%	Weak	10-20%	0	3	4	7	2	4	6	3	4	7	3	4	7
6	Embryonal carcinoma	Mixed tumor	1-10%	Weak	0	0	3	4	7	2	4	6	3	4	7	3	4	7
6	Yolk sac tumor	Mixed tumor	.	Moderate	.	0	2	4	6	2	4	6	3	4	7	2	4	6
6	Teratoma	Mixed tumor	.	Moderate	.	0	2	3	5	2	4	6	3	4	7	2	4	6
16	Teratoma	Mixed tumor	1-10%	Weak	0	1-10%	1	1	2	1	1	2	2	4	6	1	2	3
16	Yolk sac tumor	Mixed tumor	.	Weak	.	0	1	1	2	1	1	2	2	4	6	2	4	6
22	Embryonal carcinoma	Pure EC	1-10%	Absent	80-90%	0	2	4	6	2	4	6	3	4	7	3	4	7
24	Teratoma	Mixed tumor	30-40%	Strong	20-30%	0	3	3	6	3	4	7	3	4	7	2	3	5
24	Seminoma	Mixed tumor	.	Weak	.	0	3	4	7	2	4	6	3	4	7	3	4	7
24	Embryonal carcinoma	Mixed tumor	.	Weak	.	0	2	3	5	2	4	6	3	4	7	3	4	7
24	Choriocarcinoma	Mixed tumor	.	Moderate	.	1-10%	2	1	3	3	2	5	2	2	4	2	2	4
26	Teratoma	Pure TE	1-10%	Strong	0	0	2	3	5	2	3	5	3	4	7	2	4	6
27	Embryonal carcinoma	Mixed tumor	40-50%	Moderate	80-90%	0	3	4	7	2	4	6	3	4	7	3	4	7
29	Seminoma	Pure Seminoma	1-10%	Moderate	1-10%	0	2	3	5	3	4	7	3	4	7	3	4	7
30	Seminoma	Pure Seminoma	1-10%	Moderate	40-50%	0	3	4	7	3	4	7	3	4	7	3	4	7
37	Embryonal carcinoma	Mixed tumor	1-10%	Moderate	30-40%	1-10%	3	4	7	3	3	6	3	4	7	3	4	7
37	Teratoma	Mixed tumor	.	Strong	.	0	3	4	7	3	4	7	3	4	7	2	4	6
37	Yolk sac tumor	Mixed tumor	.	Moderate	.	0	2	4	6	2	4	6	3	4	7	2	4	6
40	Seminoma	Pure Seminoma	1-10%	Moderate	70-80%	1-10%	3	4	7	3	4	7	3	4	7	3	4	7
41	Embryonal carcinoma	Mixed tumor	10-20%	Absent	1-10%	0	2	3	5	2	3	5	3	4	7	3	4	7
41	Teratoma	Mixed tumor	.	Strong	.	0	1	4	5	2	4	6	3	4	7	2	4	6
41	Yolk sac tumor	Mixed tumor	.	Strong	.	0	1	4	5	2	4	6	2	4	6	2	4	6
42	Seminoma	Pure Seminoma	1-10%	Weak	90-100%	1-10%	3	4	7	3	4	7	3	4	7	3	4	7
43	Embryonal carcinoma	Mixed tumor	1-10%	Weak	10-20%	1-10%	3	4	7	3	4	7	3	4	7	3	4	7
43	Yolk sac tumor	Mixed tumor	.	Weak	.	0	3	4	7	3	4	7	3	4	7	3	4	7
44	Embryonal carcinoma	Mixed tumor	50-60%	Weak	30-40%	1-10%	3	4	7	2	4	6	3	4	7	3	4	7
44	Seminoma	Mixed tumor	.	Moderate	.	0	3	4	7	3	4	7	3	4	7	3	4	7
44	Choriocarcinoma	Mixed tumor	.	Moderate	.	60-70%	3	3	6	3	4	7	2	4	6	2	3	5
48	Embryonal carcinoma	Mixed tumor	1-10%	Weak	1-10%	0	2	2	4	2	2	4	3	4	7	3	4	7
48	Teratoma	Mixed tumor	.	Weak	.	0	1	1	2	1	2	3	3	4	7	3	4	7
48	Yolk sac tumor	Mixed tumor	.	Weak	.	0	1	1	2	1	2	3	3	4	7	3	4	7
49	Seminoma	Pure Seminoma	1-10%	Moderate	0	0	3	4	7	3	4	7	3	4	7	3	4	7
51	Yolk sac tumor	Mixed tumor	10-20%	Moderate	0	1-10%	1	1	2	2	4	6	3	4	7	3	4	7
54	Seminoma	Pure Seminoma	1-10%	Absent	1-10%	0	3	4	7	3	4	7	3	4	7	3	4	7
55	Seminoma	Mixed tumor	10-20%	Weak	1-10%	0	3	2	5	3	4	7	3	4	7	3	4	7
55	Embryonal carcinoma	Mixed tumor	.	Weak	.	1-10%	2	2	4	2	4	6	3	4	7	2	4	6
55	Teratoma	Mixed tumor	.	Strong	.	0	2	3	5	2	4	6	2	4	6	2	4	6
55	Yolk sac tumor	Mixed tumor	.	Strong	.	0	1	1	2	2	4	6	2	4	6	2	2	4
57	Seminoma	Pure Seminoma	1-10%	Weak	1-10%	0	3	3	6	3	4	7	3	4	7	3	4	7
59	Seminoma	Mixed tumor	1-10%	Weak	1-10%	0	3	3	6	3	4	7	3	4	7	3	3	6
59	Yolk sac tumor	Mixed tumor	.	Moderate	.	0	1	1	2	1	2	3	3	4	7	2	3	5
59	Teratoma	Mixed tumor	.	Weak	.	0	2	1	3	1	2	3	2	3	5	2	1	3
62	Seminoma	Mixed tumor	1-10%	Weak	1-10%	0	3	4	7	3	4	7	3	4	7	3	4	7
62	Teratoma	Mixed tumor	.	Moderate	.	0	1	2	3	1	2	3	2	4	6	1	3	4
64	Embryonal carcinoma	Mixed tumor	30-40%	Moderate	30-40%	1-10%	1	1	2	3	4	7	3	4	7	3	4	7
67	Embryonal carcinoma	Mixed tumor	1-10%	Moderate	1-10%	0	2	2	4	2	2	4	3	4	7	3	4	7
67	Yolk sac tumor	Mixed tumor	.	Weak	.	0	1	1	2	2	1	3	2	4	6	1	1	2
67	Teratoma	Mixed tumor	.	Strong	.	0	1	1	2	2	2	4	2	4	6	2	2	4
68	Seminoma	Pure Seminoma	1-10%	Moderate	70-80%	1-10%	3	4	7	3	4	7	3	4	7	3	4	7
71	Embryonal carcinoma	Pure EC	10-20%	Absent	10-20%	0	2	3	5	2	4	6	3	4	7	3	4	7
72	Seminoma	Pure Seminoma	1-10%	Absent	30-40%	0	3	4	7	3	4	7	3	4	7	3	4	7
73	Seminoma	Pure Seminoma	1-10%	Moderate	50-60%	0	3	4	7	3	4	7	3	4	7	3	4	7
74	Embryonal carcinoma	Mixed tumor	1-10%	Weak	50-60%	1-10%	2	3	5	2	2	4	3	4	7	3	4	7
74	Yolk sac tumor	Mixed tumor	.	Moderate	.	1-10%	1	1	2	2	2	4	2	4	6	2	4	6
74	Teratoma	Mixed tumor	.	Moderate	.	0	2	2	4	2	1	3	2	4	6	2	4	6
75	Embryonal carcinoma	Mixed tumor	20-30%	Weak	1-10%	1-10%	2	2	4	2	4	6	3	4	7	3	4	7
75	Yolk sac tumor	Mixed tumor	.	Moderate	.	0	1	1	2	2	4	6	2	4	6	2	4	6
76	Seminoma	Pure Seminoma	70-80%	Strong	1-10%	0	3	4	7	3	4	7	3	4	7	3	4	7
80	Yolk sac tumor	Mixed tumor	20-30%	Strong	0	0	2	4	6	3	4	7	3	4	7	3	4	7
80	Teratoma	Mixed tumor	.	Strong	.	0	1	2	3	2	2	4	3	4	7	2	3	5
83	Teratoma	Mixed tumor	1-10%	Strong	10-20%	0	2	1	3	2	2	4	2	4	6	3	3	6
83	Seminoma	Mixed tumor	.	Missing	.	1-10%	3	4	7	3	4	7	3	4	7	3	4	7
84	Seminoma	Pure Seminoma	20-30%	Moderate	80-90%	0	3	4	7	3	4	7	3	4	7	3	4	7
85	Embryonal carcinoma	Pure EC	20-30%	Weak	80-90%	1-10%	1	4	5	2	4	6	3	4	7	3	4	7
94	Seminoma	Pure Seminoma	50-60%	Moderate	1-10%	0	2	4	6	3	4	7	3	4	7	3	4	7
95	Seminoma	Pure Seminoma	1-10%	Weak	1-10%	0	3	4	7	3	4	7	3	4	7	3	4	7
96	Seminoma	Pure Seminoma	1-10%	Weak	1-10%	0	3	3	6	3	4	7	3	4	7	3	4	7
97	Embryonal carcinoma	Mixed tumor	40-50%	Absent	0	0	2	4	6	2	2	4	3	4	7	3	4	7
97	Teratoma	Mixed tumor	.	Moderate	.	0	1	1	2	1	1	2	2	4	6	2	4	6
98	Seminoma	Pure Seminoma	20-30%	Weak	1-10%	0	3	4	7	3	4	7	3	4	7	3	4	7
99	Embryonal carcinoma	Mixed tumor	1-10%	Weak	0	0	2	3	5	2	3	5	3	4	7	3	4	7
99	Teratoma	Mixed tumor	.	Strong	.	0	2	3	5	2	3	5	3	4	7	3	4	7
99	Yolk sac tumor	Mixed tumor	.	Strong	.	0	2	3	5	2	3	5	3	4	7	3	4	7
101	Seminoma	Mixed tumor	1-10%	Weak	1-10%	0	3	3	6	2	3	5	3	4	7	3	4	7
101	Embryonal carcinoma	Mixed tumor	.	Weak	.	0	3	4	7	3	4	7	3	4	7	3	4	7
101	Yolk sac tumor	Mixed tumor	.	Weak	.	0	2	3	5	2	3	5	2	4	6	3	4	7
101	Teratoma	Mixed tumor	.	Strong	.	0	2	3	5	3	3	6	3	4	7	3	4	7
104	Seminoma	Pure Seminoma	1-10%	Weak	10-20%	0	2	2	4	3	2	5	3	4	7	3	2	5
106	Teratoma	Mixed tumor	1-10%	Strong	0	0	1	1	2	2	3	5	2	4	6	0	0	0
106	Yolk sac tumor	Mixed tumor	.	Moderate	.	0	1	1	2	2	3	5	2	4	6	1	3	4
106	Embryonal carcinoma	Mixed tumor	.	Moderate	.	0	2	2	4	2	3	5	3	4	7	3	3	6
107	Embryonal carcinoma	Mixed tumor	20-30%	Moderate	1-10%	0	2	4	6	2	4	6	3	4	7	3	4	7
107	Yolk sac tumor	Mixed tumor	.	Strong	.	0	2	4	6	2	4	6	2	4	6	2	4	6
107	Teratoma	Mixed tumor	.	Strong	.	0	2	4	6	2	4	6	3	4	7	1	4	5
109	Embryonal carcinoma	Mixed tumor	20-30%	Moderate	50-60%	0	3	4	7	3	4	7	3	4	7	3	4	7
109	Teratoma	Mixed tumor	.	Strong	.	0	2	4	6	3	4	7	1	3	4	3	4	7
111	Seminoma	Mixed tumor	1-10%	Weak	50-60%	1-10%	2	4	6	3	4	7	3	4	7	3	4	7
111	Teratoma	Mixed tumor	.	Missing	.	.	.	.	.	.	.	.	.	.	.	.	.	.
111	Embryonal carcinoma	Mixed tumor	.	Missing	.	.	.	.	.	.	.	.	.	.	.	.	.	.
111	Yolk sac tumor	Mixed tumor	.	Missing	.	.	.	.	.	.	.	.	.	.	.	.	.	.
112	Seminoma	Pure Seminoma	20-30%	Moderate	1-10%	0	3	3	6	2	2	4	3	4	7	3	3	6
113	Seminoma	Pure Seminoma	30-40%	Weak	20-30%	0	3	4	7	3	3	6	3	4	7	3	4	7
117	Seminoma	Pure Seminoma	30-40%	Moderate	1-10%	0	3	4	7	3	4	7	3	4	7	3	4	7
118	Embryonal carcinoma	Pure EC	20-30%	Weak	20-30%	0	2	3	5	2	2	4	3	4	7	3	3	6
119	Seminoma	Mixed tumor	1-10%	Weak	1-10%	0	3	4	7	3	4	7	3	4	7	3	4	7
119	Embryonal carcinoma	Mixed tumor	.	Weak	.	0	3	4	7	3	4	7	3	4	7	3	4	7
120	Seminoma	Pure Seminoma	1-10%	Weak	50-60%	1-10%	3	4	7	3	4	7	3	4	7	3	4	7
121	Seminoma	Pure Seminoma	1-10%	Moderate	1-10%	1-10%	3	3	6	3	2	5	3	4	7	3	2	5
122	Seminoma	Pure Seminoma	1-10%	Moderate	1-10%	0	1	2	3	2	3	5	3	4	7	3	1	4
124	Seminoma	Pure Seminoma	60-70%	Strong	30-40%	0	3	4	7	3	4	7	3	4	7	3	4	7
127	Seminoma	Pure Seminoma	70-80%	Moderate	10-20%	1-10%	2	3	5	3	3	6	3	4	7	3	3	6
129	Seminoma	Pure Seminoma	1-10%	Weak	1-10%	0	3	4	7	3	4	7	3	4	7	3	4	7
131	Seminoma	Pure Seminoma	20-30%	Moderate	1-10%	0	3	4	7	3	4	7	3	3	6	3	4	7
135	Seminoma	Mixed tumor	1-10%	Weak	1-10%	1-10%	3	4	7	3	3	6	3	4	7	3	4	7
135	Teratoma	Mixed tumor	.	Moderate	.	0	1	2	3	2	3	5	2	4	6	2	2	4
136	Seminoma	Pure Seminoma	10-20%	Weak	1-10%	0	2	3	5	2	4	6	3	4	7	3	4	7
143	Choriocarcinoma	Mixed tumor	50-60%	Moderate	0	80-90%	3	4	7	3	4	7	3	4	7	3	3	6
146	Seminoma	Pure Seminoma	30-40%	Moderate	10-20%	1-10%	3	4	7	3	3	6	3	4	7	3	3	6
149	Seminoma	Pure Seminoma	1-10%	Weak	1-10%	0	2	3	5	3	3	6	0	0	0	0	0	0
153	Seminoma	Pure Seminoma	30-40%	Moderate	1-10%	0	3	2	5	3	2	5	3	1	4	3	1	4
161	Teratoma	Pure TE	50-60%	Strong	1-10%	0	2	2	4	2	2	4	3	3	6	2	4	6
163	Yolk sac tumor	Mixed tumor	1-10%	Strong	1-10%	0	2	1	3	2	4	6	3	1	4	3	2	5
164	Seminoma	Pure Seminoma	30-40%	Moderate	1-10%	0	3	2	5	3	3	6	3	3	6	3	4	7
166	Teratoma	Mixed tumor	1-10%	Moderate	1-10%	0	2	4	6	3	3	6	3	4	7	3	4	7
166	Embryonal carcinoma	Mixed tumor	.	Moderate	.	0	1	2	3	3	3	6	3	4	7	2	2	4
167	Seminoma	Pure Seminoma	20-30%	Weak	1-10%	0	3	3	6	3	4	7	3	4	7	3	3	6
171	Embryonal carcinoma	Mixed tumor	1-10%	Moderate	1-10%	0	3	4	7	3	4	7	3	4	7	3	4	7
171	Teratoma	Mixed tumor	.	Moderate	.	0	2	4	6	3	4	7	2	4	6	2	4	6
171	Choriocarcinoma	Mixed tumor	.	Moderate	.	40-50%	3	4	7	3	4	7	2	4	6	2	4	6
171	Yolk sac tumor	Mixed tumor	.	Moderate	.	0	3	4	7	3	4	7	2	4	6	2	4	6
172	Seminoma	Pure Seminoma	1-10%	Moderate	1-10%	1-10%	3	3	6	3	3	6	3	4	7	3	3	6
173	Embryonal carcinoma	Pure EC	1-10%	Moderate	1-10%	0	2	2	4	2	1	3	3	4	7	3	4	7
174	Seminoma	Pure Seminoma	1-10%	Absent	40-50%	1-10%	3	4	7	3	4	7	3	4	7	3	4	7
176	Embryonal carcinoma	Mixed tumor	1-10%	Absent	1-10%	1-10%	2	3	5	2	2	4	2	4	6	3	4	7
176	Yolk sac tumor	Mixed tumor	.	Moderate	.	0	2	4	6	3	4	7	3	4	7	3	4	7
176	Teratoma	Mixed tumor	.	Strong	.	0	1	1	2	1	1	2	1	2	3	1	1	2
177	Seminoma	Pure Seminoma	1-10%	Absent	20-30%	0	3	4	7	3	4	7	3	4	7	3	4	7
178	Seminoma	Pure Seminoma	1-10%	Moderate	1-10%	1-10%	3	2	5	2	2	4	3	4	7	3	3	6
189	Embryonal carcinoma	Pure EC	1-10%	Weak	80-90%	1-10%	3	4	7	2	4	6	3	4	7	3	4	7
193	Seminoma	Pure Seminoma	30-40%	Weak	1-10%	0	3	3	6	3	2	5	2	4	6	3	3	6
194	Embryonal carcinoma	Mixed tumor	1-10%	Absent	1-10%	1-10%	3	4	7	3	4	7	3	4	7	3	4	7
194	Seminoma	Mixed tumor	.	Absent	.	0	3	4	7	3	4	7	3	4	7	3	4	7
196	Embryonal carcinoma	Mixed tumor	1-10%	Weak	40-50%	1-10%	2	4	6	2	4	6	3	4	7	3	4	7
196	Yolk sac tumor	Mixed tumor	.	Moderate	.	1-10%	1	2	3	1	2	3	2	4	6	2	4	6
196	Teratoma	Mixed tumor	.	Moderate	.	0	1	2	3	1	2	3	2	4	6	2	4	6
196	Seminoma	Mixed tumor	.	Weak	.	0	3	4	7	3	4	7	3	4	7	3	4	7
197	Seminoma	Pure Seminoma	1-10%	Weak	1-10%	0	2	2	4	3	2	5	2	4	6	3	2	5
198	Embryonal carcinoma	Mixed tumor	1-10%	Moderate	50-60%	1-10%	.		.	.		.	.	.	.	.	.	.
198	Seminoma	Mixed tumor	.	Absent	.	0	3	4	7	3	4	7	3	4	7	3	4	7
199	Seminoma	Pure Seminoma	1-10%	Weak	1-10%	0	3	2	5	3	2	5	3	4	7	3	2	5
201	Seminoma	Pure Seminoma	1-10%	Weak	0	0	3	4	7	2	2	4	3	4	7	3	2	5
203	Embryonal carcinoma	Mixed tumor	1-10%	Absent	30-40%	0	2	4	6	2	4	6	3	4	7	3	4	7
203	Seminoma	Mixed tumor	.	Absent	.	0	3	4	7	3	4	7	3	4	7	3	4	7
203	Teratoma	Mixed tumor	.	Absent	.	0	.	.	.	.	.	.	.	.	.	.	.	.
204	Seminoma	Pure Seminoma	1-10%	Weak	0	0	3	4	7	3	4	7	3	4	7	3	4	7
207	Teratoma	Mixed tumor	0	Strong	0	0	1	1	2	2	4	6	2	1	3	1	1	2
207	Seminoma	Mixed tumor	.	Absent	.	0	3	4	7	3	4	7	3	4	7	3	4	7
208	Seminoma	Pure Seminoma	30-40%	Weak	10-20%	0	3	4	7	3	4	7	3	4	7	3	4	7
209	Seminoma	Pure Seminoma	1-10%	Weak	80-90%	1-10%	3	4	7	3	4	7	3	4	7	3	4	7
212	Teratoma	Mixed tumor	1-10%	Moderate	20-30%	0	2	3	5	2	4	6	3	4	7	2	4	6
212	Embryonal carcinoma	Mixed tumor	.	Moderate	.	1-10%	2	4	6	2	4	6	3	4	7	3	4	7
212	Yolk sac tumor	Mixed tumor	.	Moderate	.	1-10%	2	4	6	2	4	6	3	4	7	2	4	6
213	Teratoma	Mixed tumor	1-10%	Strong	0	0	2	3	5	3	3	6	3	3	6	3	2	5
213	Seminoma	Mixed tumor	.	Moderate	.	0	3	4	7	3	4	7	3	4	7	3	4	7
214	Seminoma	Pure Seminoma	1-10%	Absent	1-10%	0	3	3	6	3	3	6	3	2	5	3	2	5
215	Seminoma	Pure Seminoma	50-60%	Moderate	80-90%	1-10%	3	2	5	3	3	6	3	2	5	3	3	6
216	Seminoma	Pure Seminoma	1-10%	Moderate	1-10%	20-30%	3	4	7	3	4	7	3	4	7	3	4	7
218	Embryonal carcinoma	Pure EC	20-30%	Weak	1-10%	20-30%	2	4	6	2	4	6	3	4	7	3	3	6
223	Seminoma	Pure Seminoma	30-40%	Weak	40-50%	0	3	4	7	3	4	7	3	4	7	3	4	7
224	Embryonal carcinoma	Mixed tumor	1-10%	Weak	70-80%	0	2	4	6	2	4	6	3	4	7	3	4	7
224	Choriocarcinoma	Mixed tumor	.	Moderate	.	80-90%	2	4	6	2	4	6	1	4	5	2	1	3
224	Yolk sac tumor	Mixed tumor	.	Moderate	.	20-30%	2	4	6	2	4	6	1	4	5	1	2	3
225	Embryonal carcinoma	Mixed tumor	1-10%	Weak	10-20%	1-10%	2	4	6	1	3	4	3	4	7	3	4	7
225	Teratoma	Mixed tumor	.	Strong	.	0	2	4	6	1	3	4	3	4	7	3	4	7
225	Choriocarcinoma	Mixed tumor	.	Moderate	.	90-100%	1	1	2	2	4	6	2	4	6	2	4	6
225	Yolk sac tumor	Mixed tumor	.	Weak	.	0	2	4	6	2	4	6	2	4	6	1	4	5
227	Teratoma	Mixed tumor	1-10%	Strong	1-10%	0	2	3	5	2	3	5	3	4	7	3	2	5
227	Yolk sac tumor	Mixed tumor	.	Moderate	.	0	3	4	7	3	4	7	2	4	6	2	2	4
231	Teratoma	Mixed tumor	1-10%	Strong	1-10%	0	2	2	4	2	3	5	1	3	4	2	4	6
231	Embryonal carcinoma	Mixed tumor	.	Moderate	.	0	3	4	7	2	4	6	3	4	7	3	4	7
231	Yolk sac tumor	Mixed tumor	.	Moderate	.	0	2	4	6	2	4	6	2	4	6	2	4	6
233	Seminoma	Pure Seminoma	40-50%	Moderate	1-10%	0	3	2	5	3	4	7	3	4	7	3	4	7
233_2 (2nd tumor; bilateral)	Seminoma	Pure Seminoma	30-40%	Moderate	1-10%	0	3	2	5	3	3	6	3	2	5	3	3	6
236	Yolk sac tumor	Mixed tumor	20-30%	Strong	20-30%	0	2	3	5	2	4	6	2	4	6	2	4	6
236	Embryonal carcinoma	Mixed tumor	.	Moderate	.	0	2	3	5	2	2	4	3	4	7	3	4	7
236	Teratoma	Mixed tumor	.	Strong	.	0	1	2	3	2	4	6	2	4	6	2	4	6
236	Seminoma	Mixed tumor	.	Moderate	.	0	3	4	7	3	4	7	3	4	7	3	4	7
237	Yolk sac tumor	Mixed tumor	1-10%	Strong	1-10%	0	3	4	7	2	4	6	3	4	7	2	4	6
237	Teratoma	Mixed tumor	.	Strong	.	0	2	3	5	2	4	6	2	4	6	2	4	6
237	Embryonal carcinoma	Mixed tumor	.	Moderate	.	0	2	3	5	1	4	5	3	4	7	3	4	7
237	Choriocarcinoma	Mixed tumor	.	Strong	.	70-80%	2	2	4	1	1	2	2	4	6	1	4	5
238	Embryonal carcinoma	Mixed tumor	1-10%	Moderate	1-10%	0	3	4	7	3	4	7	3	4	7	3	4	7
238	Yolk sac tumor	Mixed tumor	.	Strong	.	0	2	4	6	3	4	7	2	4	6	2	4	6
239	Seminoma	Pure Seminoma	30-40%	Strong	40-50%	1-10%	3	4	7	3	4	7	3	4	7	3	4	7
240	Embryonal carcinoma	Mixed tumor	30-40%	Moderate	50-60%	1-10%	3	2	5	3	4	7	3	4	7	.	.	.
240	Choriocarcinoma	Mixed tumor	.	Strong	.	1-10%	2	2	4	2	4	6	3	4	7	.	.	.
240	Yolk sac tumor	Mixed tumor	.	Strong	.	1-10%	1	2	3	1	4	5	3	4	7	.	.	.
240	Teratoma	Mixed tumor	.	Strong	.	0	1	2	3	2	4	6	1	2	3	.	.	.
241	Seminoma	Pure Seminoma	40-50%	Strong	50-60%	1-10%	3	4	7	3	4	7	3	4	7	3	4	7
242	Embryonal carcinoma	Mixed tumor	0	Moderate	1-10%	1-10%	3	4	7	3	4	7	3	4	7	3	4	7
242	Yolk sac tumor	Mixed tumor	.	Moderate	.	0	2	4	6	2	4	6	3	4	7	2	4	6
242	Teratoma	Mixed tumor	.	Strong	.	0	2	4	6	1	2	3	3	4	7	2	4	6
243	Embryonal carcinoma	Mixed tumor	1-10%	Weak	1-10%	0	2	4	6	3	4	7	3	4	7	3	4	7
243	Yolk sac tumor	Mixed tumor	.	Absent	.	0	2	4	6	3	4	7	2	4	6	2	4	6
243	Teratoma	Mixed tumor	.	Absent	.	0	.	.	.	.	.	.	.	.	.	.	.	.
247	Seminoma	Pure Seminoma	1-10%	Weak	0	0	3	4	7	3	4	7	3	4	7	3	4	7
248	Yolk sac tumor	Mixed tumor	1-10%	Moderate	0	0	2	4	6	3	4	7	3	4	7	2	4	6
248	Embryonal carcinoma	Mixed tumor	.	Weak	.	0	1	4	5	2	4	6	3	4	7	3	4	7
248	Teratoma	Mixed tumor	.	Moderate	.	0	2	4	6	2	4	6	3	4	7	2	4	6
249	Embryonal carcinoma	Mixed tumor	1-10%	Weak	0	0	2	3	5	1	3	4	2	4	6	3	4	7
249	Teratoma	Mixed tumor	.	Weak	.	0	2	3	5	1	3	4	2	4	6	3	4	7
249	Yolk sac tumor	Mixed tumor	.	Moderate	.	0	1	3	4	1	3	4	1	3	4	2	4	6
249	Choriocarcinoma	Mixed tumor	.	Moderate	.	0	1	3	4	1	3	4	1	2	3	2	4	6
252	Seminoma	Pure Seminoma	1-10%	Weak	0	0	3	3	6	3	4	7	3	4	7	3	3	6
255	Embryonal carcinoma	Pure EC	1-10%	Weak	1-10%	0	1	1	2	2	1	3	3	4	7	3	4	7
259	Seminoma	Pure Seminoma	0	Weak	0	0	3	3	6	3	4	7	3	4	7	3	4	7
260	Embryonal carcinoma	Mixed tumor	1-10%	Weak	1-10%	0	2	2	4	2	3	5	3	4	7	3	4	7
260	Seminoma	Mixed tumor	.	Weak	.	0	2	4	6	2	3	5	3	3	6	.	.	.
263	Seminoma	Pure Seminoma	10-20%	Weak	70-80%	1-10%	3	3	6	3	4	7	3	4	7	3	4	7
265	Seminoma	Pure Seminoma	1-10%	Weak	1-10%	0	3	4	7	3	4	7	3	4	7	3	4	7
266	Seminoma	Pure Seminoma	1-10%	Weak	50-60%	0	2	4	6	2	4	6	2	3	5	3	2	5
268	Seminoma	Pure Seminoma	1-10%	Weak	0	0	3	2	5	2	3	5	3	2	5	3	3	6
269	Seminoma	Pure Seminoma	1-10%	Weak	30-40%	0	3	3	6	3	4	7	2	4	6	3	3	6
271	Embryonal carcinoma	Mixed tumor	1-10%	Weak	1-10%	0	2	4	6	3	4	7	3	4	7	3	4	7
271	Seminoma	Mixed tumor	.	Weak	.	0	3	4	7	.	.	.	3	4	7	3	4	7
272	Seminoma	Pure Seminoma	60-70%	Weak	1-10%	0	3	4	7	3	4	7	3	4	7	3	4	7
273	Seminoma	Pure Seminoma	0	Absent	0	0	3	3	6	3	4	7	3	4	7	3	4	7
275	Seminoma	Pure Seminoma	1-10%	Absent	1-10%	0	3	4	7	3	4	7	3	4	7	3	4	7
276	Seminoma	Pure Seminoma	1-10%	Weak	1-10%	0	3	3	6	3	4	7	2	4	6	3	3	6
277	Seminoma	Pure Seminoma	1-10%	Absent	1-10%	0	3	4	7	3	4	7	3	4	7	3	4	7
281	Seminoma	Pure Seminoma	1-10%	Absent	0	0	2	2	4	3	4	7	3	4	7	3	4	7
281_2 (2nd tumor; bilateral)	Teratoma	Pure TE	0	Strong	0	0	1	1	2	2	2	4	2	3	5	3	2	5
282	Embryonal carcinoma	Mixed tumor	20-30%	Weak	1-10%	0	1	1	2	1	1	2	3	3	6	3	3	6
282	Teratoma	Mixed tumor	.	Strong	.	0	1	1	2	1	1	2	3	1	4	3	1	4
283	Embryonal carcinoma	Mixed tumor	1-10%	Weak	1-10%	0	2	2	4	2	4	6	3	4	7	3	4	7
283	Teratoma	Mixed tumor	.	Strong	.	0	1	2	3	2	4	6	3	4	7	2	4	6
283	Yolk sac tumor	Mixed tumor	.	Moderate	.	0	1	2	3	1	4	5	2	4	6	2	4	6
283	Choriocarcinoma	Mixed tumor	.	Moderate	.	1-10%	1	2	3	2	4	6	2	4	6	2	4	6
284	Seminoma	Pure Seminoma	1-10%	Absent	40-50%	1-10%	3	4	7	3	4	7	3	4	7	3	4	7
285	Yolk sac tumor	Mixed tumor	20-30%	Absent	0	0	2	4	6	2	4	6	3	4	7	2	4	6
287	Embryonal carcinoma	Pure EC	1-10%	Weak	10-20%	0	2	4	6	2	4	6	3	4	7	3	4	7
294	Seminoma	Pure Seminoma	1-10%	Weak	10-20%	0	3	4	7	3	4	7	3	4	7	3	4	7
295	Seminoma	Pure Seminoma	10-20%	Weak	50-60%	1-10%	3	4	7	3	3	6	3	3	6	3	4	7
296	Seminoma	Pure Seminoma	1-10%	Weak	1-10%	0	3	4	7	3	4	7	3	4	7	3	4	7
298	Seminoma	Pure Seminoma	1-10%	Weak	80-90%	1-10%	3	4	7	3	4	7	3	4	7	3	4	7
300	Embryonal carcinoma	Pure EC	1-10%	Moderate	1-10%	0	2	4	6	3	4	7	3	4	7	3	4	7
302	Embryonal carcinoma	Mixed tumor	20-30%	Weak	40-50%	1-10%	2	2	4	2	2	4	3	4	7	3	4	7
302	Yolk sac tumor	Mixed tumor	.		.	.	.	.	.	.		.	.	.	.	.	.	.
302	Choriocarcinoma	Mixed tumor	.		.	.	.	.	.	.		.	.	.	.	.	.	.
302	Seminoma	Mixed tumor	.		.	.	.	.	.	.		.	.	.	.	.	.	.
303	Seminoma	Pure Seminoma	0	Strong	70-80%	10-20%	3	3	6	3	3	6	3	3	6	3	4	7
304	Seminoma	Pure Seminoma	1-10%	Weak	10-20%	0	3	3	6	3	3	6	3	2	5	3	2	5
306	Seminoma	Pure Seminoma	1-10%	Moderate	70-80%	1-10%	3	4	7	3	3	6	3	4	7	3	4	7
307	Seminoma	Pure Seminoma	1-10%	Absent	80-90%	1-10%	3	4	7	2	2	4	3	4	7	3	4	7
308	Seminoma	Pure Seminoma	1-10%	Absent	20-30%	0	3	4	7	3	4	7	3	4	7	3	4	7
309	Teratoma	Pure TE	1-10%	Strong	0	0	3	4	7	3	4	7	3	3	6	2	4	6
310	Seminoma	Pure Seminoma	1-10%	Weak	1-10%	0	3	4	7	3	4	7	3	4	7	3	4	7
311	Seminoma	Pure Seminoma	1-10%	Weak	1-10%	0	3	4	7	3	4	7	3	4	7	2	4	6
312	Embryonal carcinoma	Mixed tumor	1-10%	Weak	1-10%	10-20%	3	4	7	3	4	7	3	4	7	3	4	7
313	Seminoma	Pure Seminoma	1-10%	Moderate	50-60%	0	3	4	7	3	4	7	3	4	7	3	4	7
314	Seminoma	Pure Seminoma	20-30%	Weak	40-50%	0	2	3	5	3	2	5	2	3	5	3	2	5
315	Seminoma	Pure Seminoma	1-10%	Weak	10-20%	1-10%	3	4	7	3	4	7	3	4	7	3	4	7
316	Seminoma	Pure Seminoma	1-10%	Weak	50-60%	1-10%	3	4	7	3	4	7	3	4	7	3	4	7
317	Seminoma	Pure Seminoma	1-10%	Weak	20-30%	0	3	3	6	2	4	6	3	4	7	3	4	7
318	Seminoma	Pure Seminoma	1-10%	Weak	1-10%	0	3	3	6	2	1	3	3	4	7	3	4	7
319	Seminoma	Pure Seminoma	1-10%	Weak	0	0	3	4	7	3	3	6	3	4	7	3	3	6
320	Embryonal carcinoma	Pure EC	30-40%	Weak	60-70%	50-60%	2	4	6	3	4	7	3	4	7	3	4	7
321	Embryonal carcinoma	Pure EC	1-10%	Weak	50-60%	10-20%	2	4	6	2	4	6	3	4	7	3	4	7
322	Seminoma	Mixed tumor	1-10%	Weak	1-10%	0	3	4	7	3	4	7	3	4	7	3	4	7
322	Teratoma	Mixed tumor	.	Moderate	.	0	2	4	6	3	4	7	2	4	6	2	4	6
322	Yolk sac tumor	Mixed tumor	.	Weak	.	0	2	4	6	3	4	7	2	4	6	2	4	6
322	Embryonal carcinoma	Mixed tumor	.	Weak	.	0	2	4	6	3	4	7	3	4	7	3	4	7
323	Seminoma	Mixed tumor	1-10%	Weak	20-30%	0	3	4	7	3	4	7	3	4	7	3	4	7
323	Embryonal carcinoma	Mixed tumor	.	Weak	.	0	3	3	6	3	3	6	3	4	7	3	4	7
323	Yolk sac tumor	Mixed tumor	.	Weak	.	0	3	4	7	3	3	6	3	4	7	3	4	7
323	Teratoma	Mixed tumor	.	Moderate	.	0	3	3	6	3	3	6	2	4	6	3	4	7
324	Seminoma	Mixed tumor	1-10%	Weak	1-10%	0	3	4	7	3	4	7	3	4	7	3	4	7
324	Embryonal carcinoma	Mixed tumor	.	Weak	.	20-30%	2	4	6	3	4	7	3	4	7	3	4	7
324	Choriocarcinoma	Mixed tumor	.	Weak	.	90-100%	3	3	6	3	4	7	1	1	2	3	2	5
324	Yolk sac tumor	Mixed tumor	.	Moderate	.	0	2	4	6	3	4	7	2	4	6	3	4	7
324	Teratoma	Mixed tumor	.	Moderate	.	0	2	4	6	3	4	7	2	4	6	3	3	6

## Sheet: Table S4 IHC metastases
Table S4. IHC metastases
Metastasis_ID	Histology in metastasis	CTLA4_ICpercentage_overallslide	CTLA4_TC_intensity_individual components	PDL1_ICpercentage_overallslide	PDL1_TC_percentage_individual components	MLH1 Intensity Score	MLH1 Percentage Score	MLH1 Combined score	PMS2 Intensity Score	PMS2 Percentage Score	PMS2 Combined score	MSH2 Intensity Score	MSH2 Percentage Score	MSH2 Combined score	MSH6 Intensity Score	MSH6 Percentage Score	MSH6 Combined score
M3	TE postpubertal (mature)	1-10%	Strong	1-10%	0	3	4	7	2	3	5	3	4	7	3	3	6
M4	Embryonal Carcinoma	1-10%	Weak	10-20%	50-60%	2	3	5	3	2	5	3	4	7	3	4	7
M5	TE postpubertal (mature)	1-10%	Moderate	1-10%	0	2	2	4	1	2	3	2	3	5	3	2	5
M7	TE postpubertal (mature)	1-10%	Strong	10-20%	0	2	1	3	2	2	4	2	2	4	3	3	6
M8	TE postpubertal (mature)	1-10%	Moderate	1-10%	0	2	2	4	2	3	5	3	3	6	3	3	6
M9	TE postpubertal (mature)	10-20%	Strong	10-20%	0	2	2	4	2	3	5	2	1	3	3	2	5
M10	TE postpubertal (mature)	1-10%	Moderate	50-60%	0	3	3	6	2	3	5	2	3	5	3	4	7
M12	Seminoma	1-10%	Weak	10-20%	10-20%	3	1	4	2	2	4	3	2	5	3	3	6
M13	Choriocarcinoma	0	Moderate	1-10%	90-100%	3	3	6	3	3	6	3	2	5	3	3	6
M14	TE postpubertal (mature)	60-70%	Strong	1-10%	0	2	1	3	2	3	5	2	3	5	3	3	6
M16	Yolk sac tumor	0	Weak	1-10%	1-10%	3	3	6	3	3	6	2	4	6	3	4	7
M18	TE postpubertal (mature)	1-10%	Strong	1-10%	0	2	4	6	2	3	5	3	4	7	3	4	7
M19	TE postpubertal (mature)	20-30%	Strong	10-20%	0	3	3	6	3	3	6	2	3	5	3	3	6
M20	Embryonal Carcinoma	10-20%	Absent	10-20%	1-10%	2	1	3	1	1	2	2	3	5	3	3	6
M21	Embryonal Carcinoma	10-20%	Absent	20-30%	1-10%	3	3	6	2	4	6	3	4	7	3	4	7
M22	Embryonal Carcinoma	1-10%	Absent	20-30%	1-10%	2	1	3	2	2	4	2	3	5	3	2	5
M23	Embryonal Carcinoma	1-10%	Moderate	1-10%	1-10%	3	4	7	2	4	6	3	4	7	3	4	7
